# Supplementary material for: Antisense oligonucleotides correct the familial dysautonomia splicing defect in IKBKAP transgenic mice
Source: PubMed Central journal article supplement — Nucleic Acids Res. 2018 Apr 17;46(10):4833–44. doi: 10.1093/nar/gky249 (PMC6007753; doi:10.1093/nar/gky249), 2018-04-17
Supplement: gky249_supp.pdf [file gky249_supp.pdf]

**Supplemental Table 1. List of PO-MOE-ASOs**

| <b>Oligo #</b> | <b>Sequence</b>  | <b>Length</b> |
|----------------|------------------|---------------|
|                | <b>Intron 19</b> |               |
| 100-86         | AGAGAATTACCACAA  | 15mer         |
| 95-81          | TTCACAGAGAATTAC  | 15mer         |
| 90-76          | AACTCTTCACAGAGA  | 15mer         |
| 85-71          | TACCTAACTCTTCAC  | 15mer         |
| 80-66          | CATTTTACCTAACTC  | 15mer         |
| 75-61          | TACACCATTTTACCT  | 15mer         |
| 70-56          | CAGGATACACCATT   | 15mer         |
| 65-51          | ATAGCCAGGATACAC  | 15mer         |
| 60-46          | TTTAAATAGCCAGGA  | 15mer         |
| 55-41          | AAACATTTAAATAGC  | 15mer         |
| 50-36          | GTAGAAAACATTTAA  | 15mer         |
| 45-31          | ATTAAGTAGAAAACA  | 15mer         |
| 40-26          | TTTTAATTAAGTAGA  | 15mer         |
| 35-21          | AACATTTTTAATTA   | 15mer         |
| 30-16          | GCAGTAACATTTTTA  | 15mer         |
| 25-11          | TTAAAGCAGTAACAT  | 15mer         |
| 20-6           | ATAAATTAAGCAGT   | 15mer         |
| 15-1           | CTTAAATAAATTA    | 15mer         |
|                | <b>Exon 20</b>   |               |
| 1-15           | GTTTCCCCTTGGCAT  | 15mer         |
| 6-20           | TCTAAGTTTCCCCTT  | 15mer         |

|       |                  |       |
|-------|------------------|-------|
| 11-25 | CAACTTCTAAGTTTC  | 15mer |
| 16-30 | ATGAACAACCTCTAA  | 15mer |
| 21-35 | CGATGATGAACAACCT | 15mer |
| 26-40 | GGGCTCGATGATGAA  | 15mer |
| 31-45 | AACCAGGGCTCGATG  | 15mer |
| 35-40 | GCTAAAACCAGGGCT  | 15mer |
| 41-55 | TCTGAGCTAAAACCA  | 15mer |
| 46-60 | CCGAATCTGAGCTAA  | 15mer |
| 51-65 | CACTTCCGAATCTGA  | 15mer |
| 56-70 | CCAACCACTCCGAA   | 15mer |
| 60-74 | TTGTCCAACCACTTC  | 15mer |
|       | <b>Intron 20</b> |       |
| 1-15  | TACAATGGCGCTTAC  | 15mer |
| 6-20  | AACAGTACAATGGCG  | 15mer |
| 11-25 | TCGCAAACAGTACAA  | 15mer |
| 16-30 | ACTAGTCGCAAACAG  | 15mer |
| 21-35 | AGCTAACTAGTCGCA  | 15mer |
| 26-40 | TCACAAGCTAACTAG  | 15mer |
| 31-45 | ATAAATCACAAGCTA  | 15mer |
| 36-50 | CACACATAAATCACA  | 15mer |
| 41-55 | GTCTTCACACATAAA  | 15mer |
| 46-60 | TTATTGTCTTCACAC  | 15mer |
| 51-65 | AATACTTATTGTCTT  | 15mer |
| 56-70 | AATAAAATACTTATT  | 15mer |

|        |                       |       |
|--------|-----------------------|-------|
| 61-75  | ATTGTAATAAAATAC       | 15mer |
| 66-80  | TCGAAATTGTAATAA       | 15mer |
| 71-85  | AGTTCTCGAAATTGT       | 15mer |
| 76-90  | TTTTAAGTTCTCGAA       | 15mer |
| 81-95  | CATAATTTTAAGTTC       | 15mer |
| 86-100 | CTTTTCATAATTTTA       | 15mer |
|        | <b>Microwalk ASOs</b> |       |
| 6-25   | TCGCAAACAGTACAATGGCG  | 20mer |
| 7-26   | GTCGCAAACAGTACAATGGC  | 20mer |
| 8-27   | AGTCGCAAACAGTACAATGG  | 20mer |
| 9-28   | TAGTCGCAAACAGTACAATG  | 20mer |
| 10-29  | CTAGTCGCAAACAGTACAAT  | 20mer |
| 11-30  | ACTAGTCGCAAACAGTACAA  | 20mer |
| 12-31  | AACTAGTCGCAAACAGTACA  | 20mer |
| 13-32  | TA ACTAGTCGCAAACAGTAC | 20mer |
| 14-33  | CTAACTAGTCGCAAACAGTA  | 20mer |
| 15-34  | GCTAACTAGTCGCAAACAGT  | 20mer |

**Supplemental Table 2. List of PCR primers used to amplify *IKBKAP* genomic fragments**

| <b>Primer</b> | <b>Sequence</b>                               |
|---------------|-----------------------------------------------|
| IKAP19F6      | GGGGAAGGATCCGCATGGAGTTAATGGTGTGTTTAGCATTACAGG |
| IKAP21R3      | GGGGAATCTAGACTTAGGGTTATGATCATAAATCAGATTGAG    |
| IKAP22R       | GGGGAATCTAGATTACTTCAATTCTGTAAAAACAAGTTAATATG  |

**Supplemental Table 3. List of primers used for RT-PCR**

**a. Primers used to amplify minigene-specific mRNA**

| Primer   | sequence                 |
|----------|--------------------------|
| pCDNAF   | TAATACGACTCACTATAGGG     |
| IKAP21R4 | CTTAGGGTTATGATCATAAATCAG |
| IKAP22R2 | TTCAATTCTGTAAAAACAAG     |

**b. Primers used to amplify endogenous *IKBKAP*-derived mRNA**

| Primer    | Sequence             |
|-----------|----------------------|
| IKAPRT19F | GTTCTGCGGAAAGTGGAGAG |
| IKAPRT21R | CATGCATTCAAATGCCTCTT |

**c. Human-specific primers used to amplify human *IKBKAP*-transgene-derived mRNA from mice**

| Primer      | Sequence              |
|-------------|-----------------------|
| HsIKAPRT18F | TGTTTTGCCTGAGGGATGC   |
| HsIKAPRT21R | AATGAAGGTTCCACATTTCCA |

**d. Human-specific primers for *GAPDH* and *ACTB***

| Primer  | Sequence              |
|---------|-----------------------|
| GAPDH_F | CAGCCTCAAGATCATCAGCAA |
| GAPDH_R | GGCCATCCACAGTCTTCTG   |
| ACTB_F  | AGAGCTACGAGCTGCCTGAC  |
| ACTB_R  | AGCACTGTGTTGGCGTACAG  |
